# Supplementary material for: Measuring and profiling Chinese secondary school English teachers’ language mindsets: an exploratory study of non-native teachers’ perceived L2 proficiency loss
Source: publisher site journal article supplement (doi:10.1515/iral-2022-0050), 2022-05-19
Supplement: Supplementary file 1 [file j_iral-2022-0050_suppl.docx]

**Appendix A. English Version Questionnaire**

**Mindsets Items (Adapted from Dweck, 1999; Lou, Masuda, & Li, 2017)**

*Fixed mindset items*

1. Your English ability is something about you that you **can't change** very much.
2. To be honest, you **can't really change** how good you are at English.
3. You have a certain amount of English ability, and you **can't really do much to change** it.

*Growth mindset items*

1. Your English ability can always be substantially **increased**.
2. No matter how much English ability you have, it can always be **increased** quite a bit.
3. No matter who you are, your English ability can be significantly **increased**.

*Decremental mindset items*

1. Your English ability can always be substantially **reduced**.
2. No matter how much English ability you have, it can always be **reduced** quite a bit.
3. No matter who you are, your English ability can be significantly **reduced**.

**Effort Beliefs Items** **(Newly developed based on Lou, Masuda, & Li, 2017)**

1. If you don’t practice enough, you will lose your English ability.
2. While it is natural that your English ability will decline in a nonnative English-speaking environment, lack of practice will aggravate the process.
3. Enough practice will prevent your English ability.

**Prevention-oriented Motivation (Newly developed based on Butler, 2004; Hoang & Wyatt, 2021)**

After finishing all the teaching work each day, I would still like to spend some time …

1. Listening to English broadcasts (e.g., VOA) or watching English movies (e.g., HBO series) to maintain my English listening ability.
2. Communicating with native English speakers (if possible) to maintain my English speaking ability.
3. Reading English articles or novels to maintain my English reading ability.
4. Writing English essays or dairies to maintain my English writing ability

**Chinese Version Questionnaire**

**Mindsets Items**

*Fixed mindset items*

1. 你的英语能力与你自身有关，你**无法**对你的英语能力做出太多改变。

2. 实话说，你**无法**真正改变你现有的英语能力。

3. 你有一定的英语能力，但是你**无法**努力改变你的英语能力。

*Growth mindset items*

4. 你的英语能力总是能够极大**提升**。

5. 不管你现在英语能力如何，你总是能够极大**提升**你的英语能力。

6. 不管你是谁，你的英语能力总是能够极大**提升**。

*Decremental mindset items*

7. 你的英语能力总是会显著**下降**。

8. 不管你现在英语能力如何，你的英语能力总是会显著**下降**。

9. 不管你是谁，你的英语能力总是会显著**下降**。

**Effort Beliefs Items**

1. 如果没有足够的训练，你就会丢失英语能力。

2. 在一个非母语的环境中，英语能力自然会下降。但是，如果没有足够训练，这个过程会加剧。

3. 通过足够的训练，你会防止英语能力丢失。

**Prevention-oriented Motivation**

每天完成日常教学工作后，我仍然愿意花一些时间：

1. 听英文广播（例如：VOA）或看英文电影（例如：美剧），以此保持我的英语听力能力。

2. 与英语为母语的外国人交流（如果有机会的话），以此保持我的英语口语能力。

3. 读英语文章或小说，以此保持我的英语阅读能力。

4. 写英语文章或日记，以此保持我的英语写作能力。
